# Supplementary material for: Mechanism of ionic polarizability, bond valence, and crystal structure on the microwave dielectric properties of disordered Li10MTi13O32 (M = Zn, Mg) spinels
Source: Royal Society of Chemistry journal article supplement (doi:10.1039/d2ma01074g), 2023-01-01
Supplement: d2ma01074g1.pdf [file d2ma01074g1.pdf]

## Supplementary material

### **Mechanism of ionic polarizability, bond valence, and crystal structure on the microwave dielectric properties of disordered $\text{Li}_{10}\text{MTi}_{13}\text{O}_{32}$ (M = Zn, Mg) spinels**

Ying Tang<sup>a,\*</sup>, Mu Li<sup>b</sup>, Huaicheng Xiang<sup>a,\*</sup>, Jie Li<sup>b</sup>, Yuandong Qin<sup>d</sup>, Liang Fang<sup>b,c</sup>

<sup>a</sup> College of Science, Guilin University of Technology, Guilin, 541004, China

<sup>b</sup> Guangxi Universities Key Laboratory of Non-Ferrous Metal Oxide Electronic Functional Materials and Devices, College of Materials Science and Engineering, Guilin University of Technology, Guilin, 541004, China

<sup>c</sup> College of Materials and Chemical Engineering, Key Laboratory of Inorganic Nonmetallic Crystalline and Energy Conversion Materials, China Three Gorges University, Yichang 443002, China

<sup>d</sup> Guangxi New Future Information Industry Co., Ltd., Beihai 536000, China

\*Corresponding Authors: tangyinggl001@aliyun.com (Y. Tang);

xianghc@glut.edu.cn (H. Xiang)

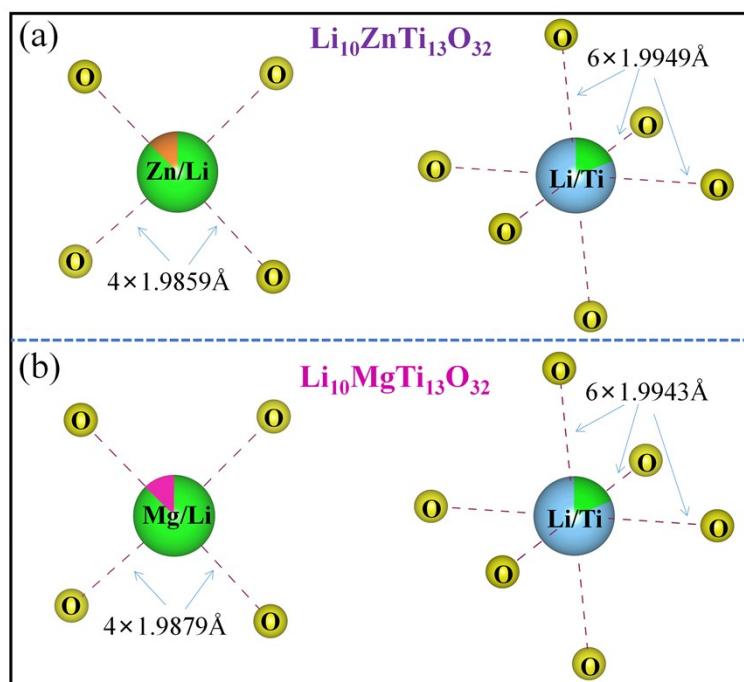

Fig. S1 Bond lengths in polyhedra of  $\text{Li}_{10}\text{MTi}_{13}\text{O}_{32}$  (M = Zn, Mg) from Rietveld refinements of XRD data.

### **The test principle of the microwave dielectric properties:**

The  $\epsilon_r$  and dielectric loss values of all samples were measured in the TE<sub>011</sub> mode which is confirmed by the software developed by Chengdu Enchi Microwave Technology Co, Ltd. The sample fixture, or resonant cavity, is designed by the instrument company.

The cylindrical disk of sample inserted between two mathematically infinite conducting plates changes the electromagnetic field of the resonant cavity. By using the scanning signal generated by the vector network analyzer, the resonant frequency and other information related to the electromagnetic field can be obtained. Based on changes in those parameters, with the diameter and height of the sample, the relative permittivity and dielectric loss can be calculated by the software. For more details about the testing, please refer to the following literatures:

[S1] L. Li, et al. IEEE Transactions on Microwave Theory and Techniques 64 (2016): 3781-3786.

[S2] D. Kajfez. IEEE transactions on microwave theory and techniques 32 (1984): 941-943.

[S3] Y. Kobayashi, et al. IEEE Transactions on Microwave Theory and Techniques 33 (1985) 1361-1366.

### P-V-L theory:

According to their crystal structure and complex chemical bond theory, the composite crystal of  $\text{Li}_{10}\text{MTi}_{13}\text{O}_{32}$  ( $\text{M} = \text{Zn}, \text{Mg}$ ) was decomposed into the sum of binary crystals:<sup>1,2</sup>

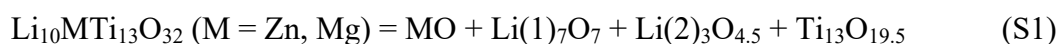

Table S1. Chemical bond type, bond length, and ionic coordination number of  $\text{Li}_{10}\text{MTi}_{13}\text{O}_{32}$  ( $\text{M} = \text{Zn}, \text{Mg}$ ) crystals.

| Compounds                                                                                                 | Central ions and number | Ionic coordination number | Bond length         | Bond type and number  | Total number of central atoms for each type of chemical bond |
|-----------------------------------------------------------------------------------------------------------|-------------------------|---------------------------|---------------------|-----------------------|--------------------------------------------------------------|
| $\text{Li}_{10}\text{ZnTi}_{13}\text{O}_{32} = \text{ZnLi}(1)_7\text{Li}(2)_3\text{Ti}_{13}\text{O}_{32}$ | Zn×1                    | 4                         | 1.9859              | Zn-O×(4×1)            | (4×1)/4=1                                                    |
|                                                                                                           | Li(1)×7                 | 4                         | 1.9859              | Li(1)-O×(4×7)         | (4×7)/4=7                                                    |
|                                                                                                           | Li(2)×3                 | 6                         | 1.9949              | Li(2)-O×(6×3)         | (6×3)/6=3                                                    |
|                                                                                                           | Ti×13                   | 6                         | 1.9949              | Ti-O×(6×13)           | (6×13)/6=13                                                  |
|                                                                                                           | O×32                    | 4                         | 1.9859              | O-Zn×(1×(1/8)×32)     | (1×(1/8)×32)/4=1                                             |
|                                                                                                           |                         |                           | 1.9859              | O-Li(1)×(1×(7/8)×32)  | (1×(7/8)×32)/4=7                                             |
|                                                                                                           |                         |                           | 1.9949              | O-Li(2)×(3×(3/16)×32) | (3×(3/16)×32)/4=4.5                                          |
| 1.9949                                                                                                    |                         |                           | O-Ti×(3×(13/16)×32) | (3×(13/16)×32)/4=19.5 |                                                              |
| $\text{Li}_{10}\text{MgTi}_{13}\text{O}_{32} = \text{MgLi}(1)_7\text{Li}(2)_3\text{Ti}_{13}\text{O}_{32}$ | Zn×1                    | 4                         | 1.9879              | Mg-O×(4×1)            | (4×1)/4=1                                                    |
|                                                                                                           | Li(1)×7                 | 4                         | 1.9879              | Li(1)-O×(4×7)         | (4×7)/4=7                                                    |
|                                                                                                           | Li(2)×3                 | 6                         | 1.9943              | Li(2)-O×(6×3)         | (6×3)/6=3                                                    |
|                                                                                                           | Ti×13                   | 6                         | 1.9943              | Ti-O×(6×13)           | (6×13)/6=13                                                  |
|                                                                                                           | O×32                    | 4                         | 1.9879              | O-Zn×(1×(1/8)×32)     | (1×(1/8)×32)/4=1                                             |
|                                                                                                           |                         |                           | 1.9879              | O-Li(1)×(1×(7/8)×32)  | (1×(7/8)×32)/4=7                                             |
|                                                                                                           |                         |                           | 1.9943              | O-Li(2)×(3×(3/16)×32) | (3×(3/16)×32)/4=4.5                                          |
| 1.9943                                                                                                    |                         |                           | O-Ti×(3×(13/16)×32) | (3×(13/16)×32)/4=19.5 |                                                              |

The relationship between bond ionicity ( $f_i$ ) and  $\varepsilon_r$  can be described by the following formula:<sup>3</sup>

$$\varepsilon_r = \frac{n^2 - 1}{1 - f_i} + 1 \quad (\text{S2})$$

where  $n$  expressed the refractive index, which is about 1.718 for spinel. The  $f_i$  of  $\mu$  bond is obtained by the following formula:<sup>4</sup>

$$f_i^\mu = \frac{(C^\mu)^2}{(E_g^\mu)^2} \quad (\text{S3})$$

where  $E_g^\mu$  and  $C^\mu$  are average energy interval and heteropolar part, respectively (Table S2, ESI).

Table S2. The bond type,  $C^\mu$ , and  $E_g^\mu$  of  $\text{Li}_{10}\text{MTi}_{13}\text{O}_{32}$  (M = Zn, Mg) ceramics.

| Compounds                                     | Bond type ( $\mu$ ) | $C^\mu$ (eV) | $E_g^\mu$ (eV) |
|-----------------------------------------------|---------------------|--------------|----------------|
| $\text{Li}_{10}\text{ZnTi}_{13}\text{O}_{32}$ | Li1–O               | -6.323525053 | 9.61970447     |
|                                               | Zn–O                | -10.05033941 | 12.39197592    |
|                                               | Li2–O               | -10.2068281  | 12.47259352    |
|                                               | Ti–O                | -25.85267461 | 26.82810157    |
| $\text{Li}_{10}\text{MgTi}_{13}\text{O}_{32}$ | Li1–O               | -6.312018476 | 9.598520766    |
|                                               | Mg–O                | -10.03105049 | 12.36575908    |
|                                               | Li2–O               | -10.21384197 | 12.48140793    |
|                                               | Ti–O                | -25.87303644 | 26.84915252    |

## References:

1. J. Phillips, *Rev. Mod. Phys.*, 1970, **42**, 317–356.
2. J. C. Phillips, and J. A. Van Vechten, *Phys. Rev. Lett.*, 1969, **22**, 705–708.
3. S. S. Batsanov, *Russ. Chem. Rev.*, 1982, **51**, 684–697.
4. B. F. Levine, *J. Chem. Phys.*, 1973, **59**, 1463–1486.
